# Supplementary material
Source: publisher figshare collection journal article supplement (https://sage.figshare.com/ndownloader/files/14523302)
Supplement: Supplementary file 1 [file 14523302]

Supplementary Table 1. Inter-correlations among scales, Study 1

|  | Sex | Age | Suggestibility | AvgBrTH | PeakBrTH | Button Presses | Feel | Like | Want | High | Intoxicated |
| --- | --- | --- | --- | --- | --- | --- | --- | --- | --- | --- | --- |
| Sex | 1 |  |  |  |  |  |  |  |  |  |  |
| Age | .312 | 1 |  |  |  |  |  |  |  |  |  |
| Suggestibility | .314 | .000 | 1 |  |  |  |  |  |  |  |  |
| AvgBrTH | **.505*** | .251 | **.476*** | 1 |  |  |  |  |  |  |  |
| PeakBrTH | **.531*** | .095 | **.516*** | **.966**** | 1 |  |  |  |  |  |  |
| Button Presses | **.468*** | .032 | **.459** | **.929**** | **.970**** | 1 |  |  |  |  |  |
| Feel | **.603*** | .223 | **.482*** | **.795**** | **.792**** | **.770**** | 1 |  |  |  |  |
| Like | **.576*** | .133 | **.616**** | **.845**** | **.865**** | **.853**** | **.759**** | 1 |  |  |  |
| Want | .473 | .167 | .326 | **.786**** | **.771**** | **.754**** | **.789**** | **.670**** | 1 |  |  |
| High | **.546*** | .285 | **.508*** | **.807**** | **.783**** | **.761**** | **.964**** | **.787**** | **.766**** | 1 |  |
| Intoxicated | **.539*** | .189 | .477 | **.769**** | **.774**** | **.767**** | **.969**** | **.741**** | **.734**** | **.971**** | 1 |

Bolded values indicate significant correlations. * p < 0.05, ** p < 0.01

Supplementary Table 2. Inter-correlations among scales, Study 2

|  | Sex | Age | Suggestibility | DMQ Social | DMQ Coping | DMQ Enhancement | DMQ Conformity | DMQ Courage | BCEOA Self-perception | BCEOA Sexuality | BCEOA Tension | Drinking days in past 90 days | Drinks in past 90 days |
| --- | --- | --- | --- | --- | --- | --- | --- | --- | --- | --- | --- | --- | --- |
| Sex | 1 |  |  |  |  |  |  |  |  |  |  |  |  |
| Age | -.036 | 1 |  |  |  |  |  |  |  |  |  |  |  |
| Suggestibility | -.020 | **-.221**** | 1 |  |  |  |  |  |  |  |  |  |  |
| DMQ Social | -.122 | .064 | **.249**** | 1 |  |  |  |  |  |  |  |  |  |
| DMQ Coping | .005 | .029 | **.227**** | **.487**** | 1 |  |  |  |  |  |  |  |  |
| DMQ Enhancement | -.139 | -.003 | **.256**** | **.594**** | **.347**** | 1 |  |  |  |  |  |  |  |
| DMQ Conformity | -.102 | .048 | **.267**** | **.367**** | **.384**** | .109 | 1 |  |  |  |  |  |  |
| DMQ Courage | -.047 | -.020 | **.304**** | **.345**** | **.272*** | .090 | **.301**** | 1 |  |  |  |  |  |
| BCEOA Self-perception | .079 | -.032 | **.242*** | .140 | .183 | -.135 | **.392**** | **.404**** | 1 |  |  |  |  |
| BCEOA Sexuality | **-.285**** | -.024 | .134 | **.256*** | **.336**** | .170 | .174 | **.485**** | .114 | 1 |  |  |  |
| BCEOA Tension | -.141 | -.056 | **.299**** | **.343**** | **.439**** | **.215*** | **.222*** | **.604**** | **.228*** | **.533**** | 1 |  |  |
| Drinking days in past 90 days | -.122 | **.621**** | .046 | **.169*** | .088 | .202* | .072 | .187 | -.013 | .084 | .092 | 1 |  |
| Drinks in past 90 days | **-.247**** | **.343**** | .068 | **.294**** | .162 | **.302**** | .079 | .152 | -.034 | **.220*** | .102 | **.712**** | 1 |

Bolded values indicate significant correlations. * p < 0.05, ** p < 0.01
